# Supplementary material for: Synergistic interaction of multi-functional additives at the buried interface for efficient blue perovskite light-emitting diodes
Source: Royal Society of Chemistry journal article supplement (doi:10.1039/d3tc04232d), 2024-01-01
Supplement: d3tc04232d1.pdf [file d3tc04232d1.pdf]

## Supporting Information

### **Synergistic interaction of multi-functional additives at the buried interface for efficient blue perovskite light-emitting diodes**

*Kaiyu Yang<sup>1,2</sup>, Qiuxiang Lin<sup>1</sup>, Baolin Xu<sup>1</sup>, Yongshen Yu<sup>2</sup>, Hailong Hu<sup>1,2</sup>, Fushan*

*Li<sup>1,2\*</sup>*

<sup>1</sup> College of Physics and Information Engineering, Fuzhou University, Fuzhou,  
People's Republic of China

<sup>2</sup> Fujian Science and Technology Innovation Laboratory for Optoelectronic  
Information of China, Fuzhou, People's Republic of China.

E-mail addresses: [fsli@fzu.edu.cn](mailto:fsli@fzu.edu.cn) (F. Li)

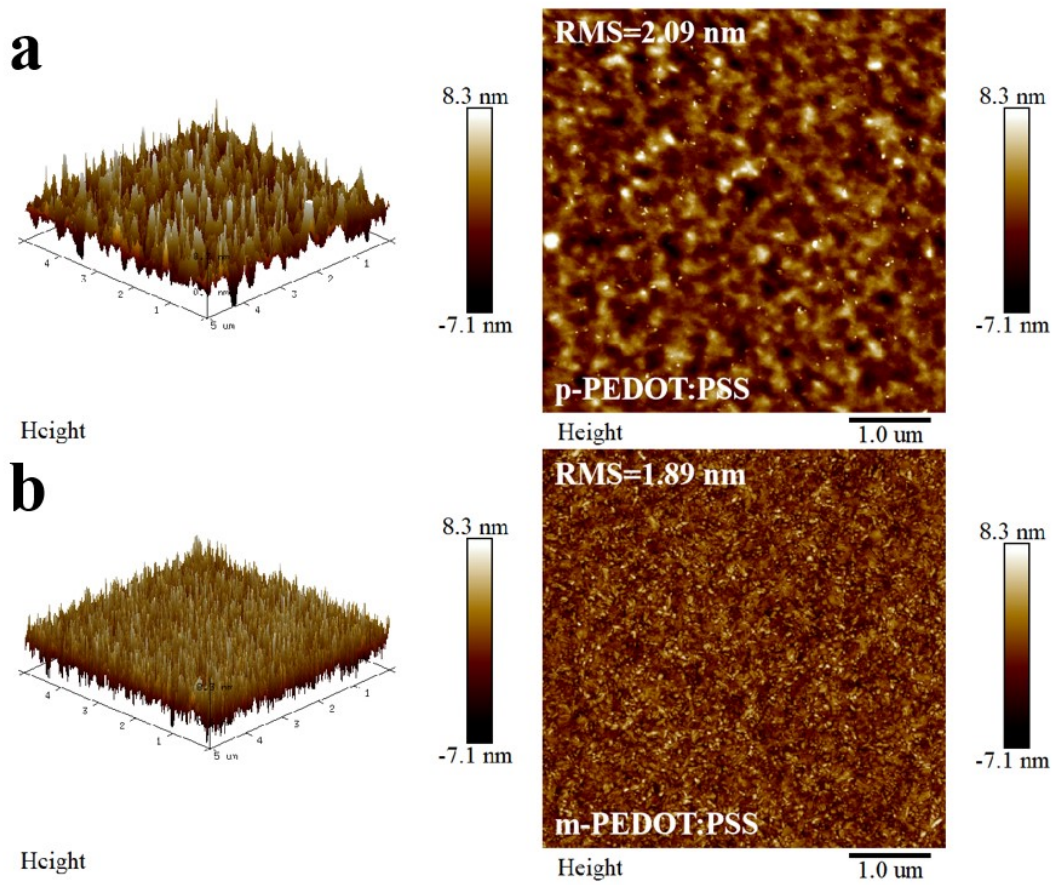

**Figure S1.** AFM characterization of perovskite films with (a) p-PEDOT:PSS and (b) m-PEDOT:PSS surfaces. Three-dimensional (3D) images (left) and height images (right).

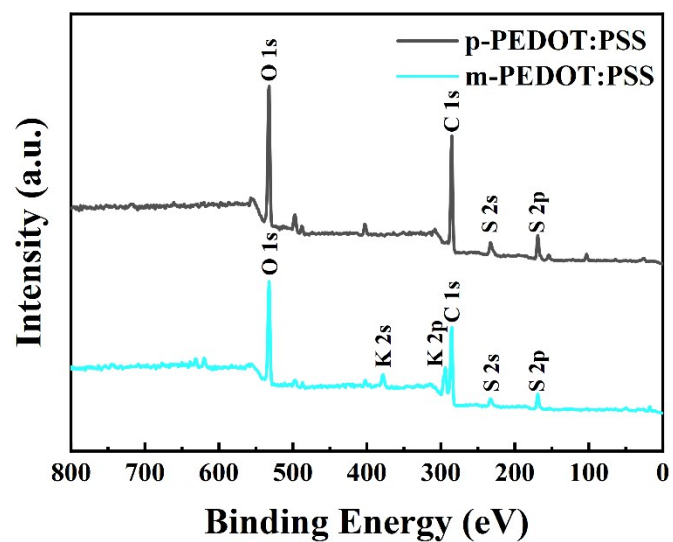

**Figure S2.** XPS wide spectra of p-PEDOT:PSS and m-PEDOT:PSS films.

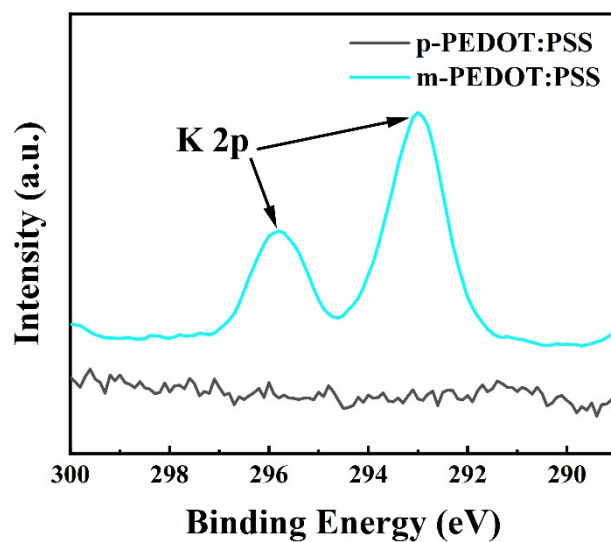

**Figure S3.** XPS spectra of the p-PEDOT:PSS and m-PEDOT:PSS, XPS K 2p spectra.

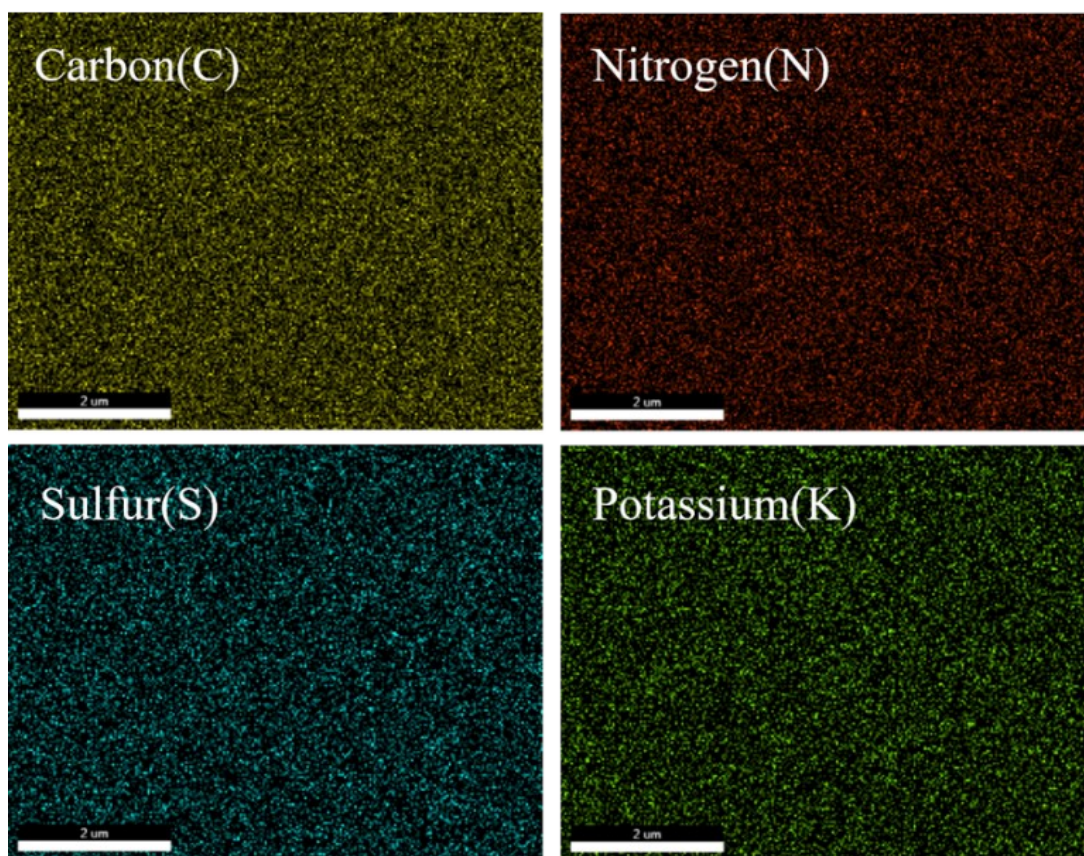

**Figure S4.** SEM image, Energy dispersive spectroscopy (EDS) mapping of carbon (C), Nitrogen(N),sulfur (S), Potassium (K) for m-PEDOT:PSS. Scale bar is 2  $\mu\text{m}$ .

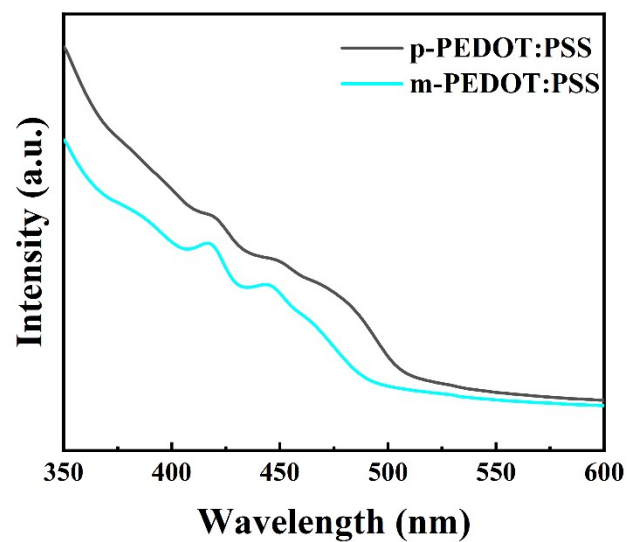

**Figure S5.** Absorption spectra of perovskite films deposited on p-PEDOT:PSS and m-PEDOT:PSS.

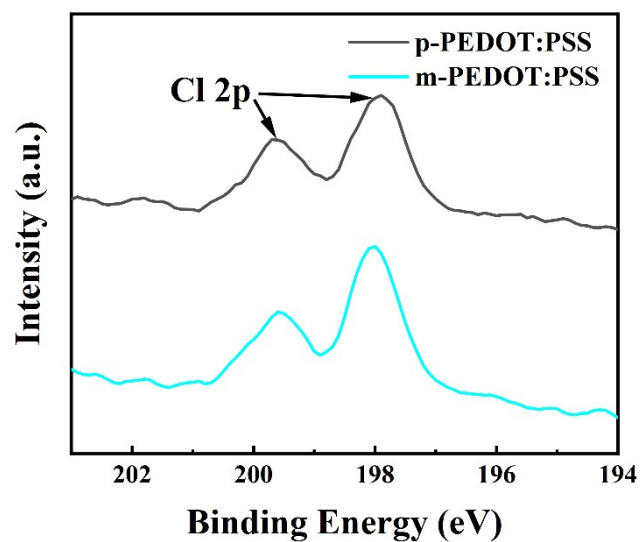

**Figure S6.** XPS spectra of the perovskite film on p-PEDOT:PSS and m-PEDOT:PSS. XPS Cl 2p spectra.

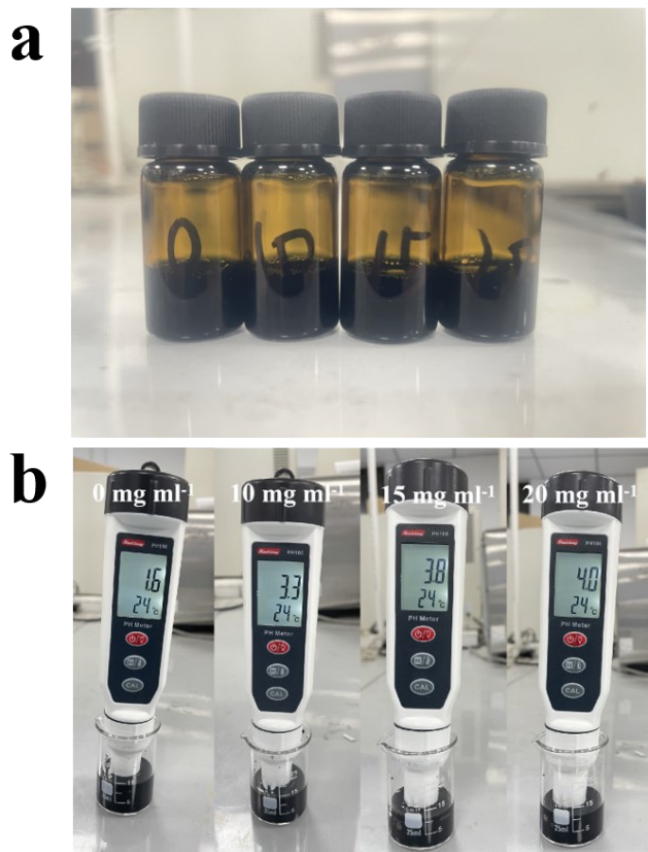

**Figure S7.** (a) Pictures of p-PEDOT:PSS and m-PEDOT:PSS solutions. (b) Pictures of acidimeter at different PLAK concentrations.



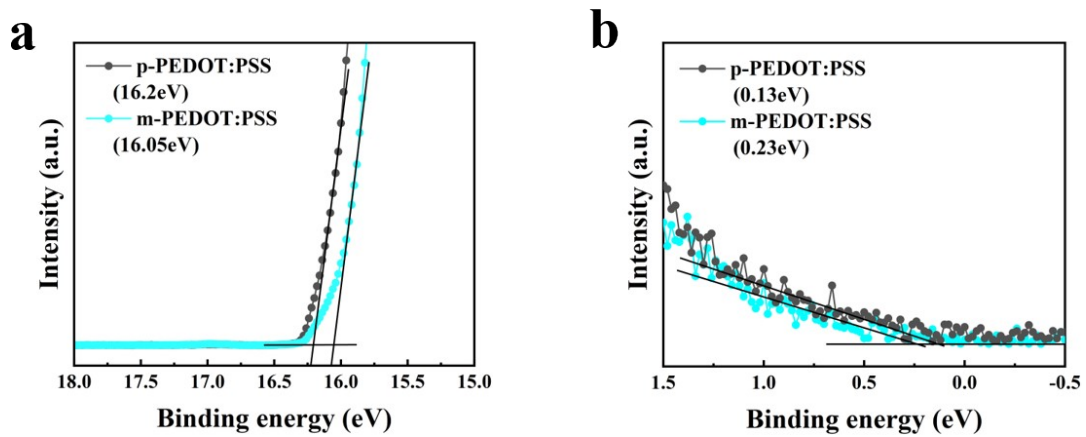

**Figure S8.** UPS spectra of p-PEDOT:PSS and m-PEDOT:PSS. (a) Secondary edge region and (b) valence band edge plotted relative to an Au reference.

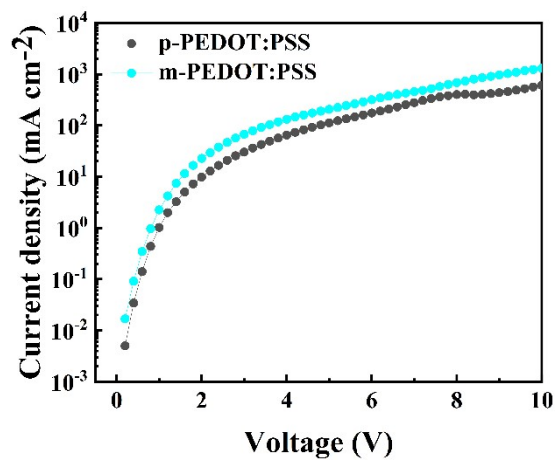

**Figure S9.** Current density-voltage curves of devices assembled by ITO/p-PEDOT:PSS and m-PEDOT:PSS/MoO<sub>3</sub>/Al.

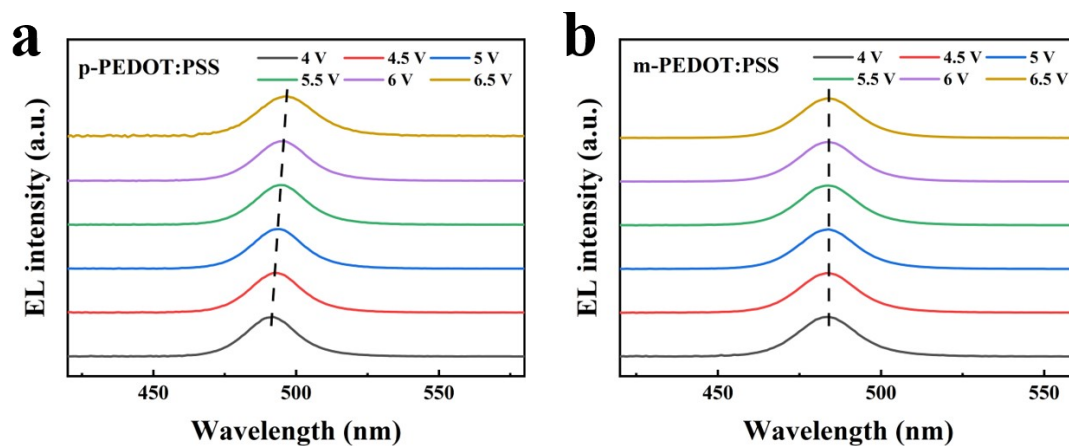

**Figure S10.** Electroluminescence spectra of PeLEDs prepared on (a) p-PEDOT:PSS and (b) m-PEDOT:PSS under various applied voltages.

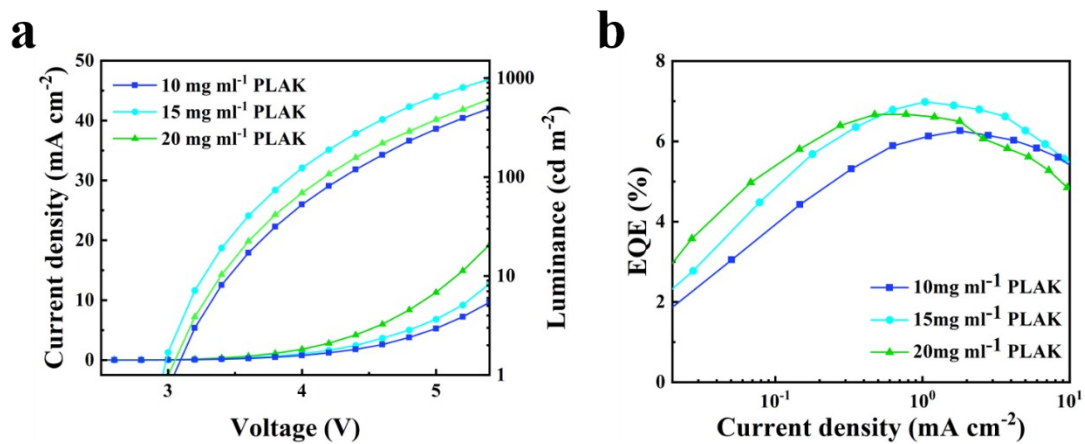

**Figure S11.** (a) Current density–luminance–voltage curves. (b) EQE–current density curves of PeLEDs prepared on PEDOT:PSS with different concentrations of PLAK addition.

**Table S1.** Double fitting parameters for PL lifetimes of quasi-2D perovskite films deposited on PEDOT:PSS w/o and w PLAK on ITO substrates.

|          | $A_1$ | $\tau_1$ (ns) | $A_2$ | $\tau_2$ (ns) | $\tau_{ave}$ (ns) |
|----------|-------|---------------|-------|---------------|-------------------|
| w/o PLAK | 0.42  | 1.13          | 0.58  | 5.69          | 3.77              |
| w PLAK   | 0.37  | 3.54          | 0.63  | 16.03         | 11.41             |

(a) The decay curves are fitted by the tri-exponential function:

$$I(t) = A_1 * e^{\left(-\frac{t}{\tau_1}\right)} + A_2 * e^{\left(-\frac{t}{\tau_2}\right)},$$

where,  $I$  is the normalized PL intensity,  $A_1$ , and  $A_2$  are the decay amplitudes and  $A_1 + A_2 = 1$ .

(b)  $\tau_1$  and  $\tau_2$  correspond to the lifetime constants of a fast component, a middle component, and a slow component, respectively. The  $\tau_{ave}$  is given by the formula:

$$\tau_{ave} = \frac{A_1\tau_1 + A_2\tau_2}{A_1 + A_2}$$

**Table S2.** Device performance of PeLEDs without and with PLAK addition.

|                                     | <b>EL peak</b> | <b>Max. EQE</b> | <b>Max. L</b>         | <b>V<sub>T</sub></b> |
|-------------------------------------|----------------|-----------------|-----------------------|----------------------|
|                                     | [nm]           | [%]             | [cd m <sup>-2</sup> ] | [V]                  |
| Without PLAK                        | 492            | 3.05            | 493                   | 3.2                  |
| With PLAK (10 mg ml <sup>-1</sup> ) | 488            | 6.26            | 494                   | 3.1                  |
| With PLAK (15 mg ml <sup>-1</sup> ) | 484            | 6.98            | 976                   | 2.9                  |
| With PLAK (20 mg ml <sup>-1</sup> ) | 484            | 6.67            | 614                   | 2.9                  |

EQE: external quantum efficiency, L: luminance, V<sub>T</sub>: turn-on voltage.

**Table S3** Summary of sky-blue PeLED performance with interface engineering.

| PeLED structure                          | EL peak<br>[nm] | FWHM<br>[nm] | EQE<br>[%]  | V <sub>T</sub><br>[V] | T <sub>50</sub><br>[s] | Ref                  |
|------------------------------------------|-----------------|--------------|-------------|-----------------------|------------------------|----------------------|
| ITO/CPE/PVSK/TPBi/LiF/Al                 | 489             | 24           | 2.6         | 3.4                   | 996                    | 1                    |
| ITO/(APDO) doped                         |                 |              |             |                       |                        |                      |
| PEDOT:PSS/PVSK/TPBi/LiF/A                | 490             | *            | 9.2         | 3.5                   | 740                    | 2                    |
| 1                                        |                 |              |             |                       |                        |                      |
| ITO/PVK/PVSK/<br>IL/TPBi/LiF/Al          | 492             | 24           | 9.0         | 3.0                   | 261                    | 3                    |
| ITO/PEDOT:PSS/PVSK/<br>CsAc/POT2T/LiF/Al | 486             | 21           | 9.2         | 3.6                   | 50                     | 4                    |
| ITO/(L-Phenylalanine) doped              |                 |              |             |                       |                        |                      |
| PEDOT:PSS/PVSK/TPBi/LiF/A                | 480             | 23           | 10.98       | 3.0                   | 460                    | 5                    |
| 1                                        |                 |              |             |                       |                        |                      |
| ITO/(PLAK) doped                         |                 |              |             |                       |                        |                      |
| PEDOT:PSS/PVSK/TPBi/LiF/A                | <b>484</b>      | <b>20</b>    | <b>6.98</b> | <b>2.9</b>            | <b>312</b>             | <b>This<br/>work</b> |
| 1                                        |                 |              |             |                       |                        |                      |

- Jang, C. H.; Harit, A. K.; Lee, S.; Kim, S. H.; Jeong, J.-E.; Park, J. H.; Jung, E. D.; Ha, J. M.; Kwak, S. K.; Woo, H. Y.; Song, M. H., Sky-Blue-Emissive Perovskite Light-Emitting Diodes: Crystal Growth and Interfacial Control Using Conjugated Polyelectrolytes as a Hole-Transporting Layer. *ACS Nano* **2020**, *14* (10), 13246-13255.
- Shen, Y.; Wang, J. K.; Li, Y. Q.; Shen, K. C.; Su, Z. H.; Chen, L.; Guo, M. L.; Cai, X. Y.; Xie, F. M.; Qian, X. Y.; Gao, X.; Zhidkov, I. S.; Tang, J. X., Interfacial “Anchoring Effect” Enables Efficient Large - Area Sky - Blue Perovskite Light - Emitting Diodes. *Advanced Science* **2021**, *8* (19).
- Sun, J.; Ren, Z.; Wang, Z.; Wang, H.; Wu, D.; Sun, X. W.; Choy, W. C. H.; Wang, K., Ionic Liquid Passivation for High - Performance Sky - Blue Quasi - 2D Perovskite Light - Emitting Diodes. *Advanced Optical Materials* **2023**, *11* (10).
- Zhu, Z.; Li, Y.; Guan, Z.; Wu, Y.; Zeng, Z.; Tsang, S.-W.; Liu, S.; Huang, X.; Lee, C.-S., Spatial Control of the Hole Accumulation Zone for Hole-Dominated Perovskite Light-Emitting Diodes by Inserting a CsAc Layer. *ACS Applied Materials & Interfaces* **2023**, *15* (5), 7044-7052.
- Shin, Y. S.; Park, C. B.; Adhikari, A.; Yoon, Y. J.; Cho, H. W.; Son, J. G.; Seo, J.; Song, T.; Lee, W.; Yeop, J.; Kim, J. W.; Gong, M.; Walker, B.; Kwon, O.-H.; Kim, G.-H.; Kim, J. Y., Manipulated Interface for Enhanced Energy Cascade in Quasi-2D Blue Perovskite Light-Emitting Diodes. *ACS Energy Letters* **2022**, *7* (10), 3345-3352.
